# Supplementary material for: Molecular methods enhance the detection of pyoderma-related Streptococcus pyogenes and emm-type distribution in children
Source: bioRxiv or medRxiv preprint supplement (doi:10.1101/2024.02.15.24302883), 2024-02-17
Supplement: Supplementary file [file media-1.pdf]

1 **Supplementary Material**

2 **Supplementary table 1: Primers and probes used in multiplex qPCR reaction**

| Target      | Forward        | Sequence                                            | Volume per 25µL reaction (µL) |
|-------------|----------------|-----------------------------------------------------|-------------------------------|
| <i>speB</i> | Forward primer | 5' CTAAACCCTTCAGCTCTTGGTACTG 3'                     | 0.75                          |
|             | Reverse primer | 5' TTGATGCCTACAACAGCACTTTG 3'                       | 0.75                          |
|             | Probe          | 5' Cy5-CGGCGCAGGCGGCTTCAAC-BHQ2 3'                  | 0.875                         |
| <i>nuc</i>  | Forward primer | 5' CATCCTAAAAAAGGTGTAGAGA 3'                        | 1                             |
|             | Reverse primer | 5' TTCAATTTTMTTTCATTTTCTACCA 3'                     | 1                             |
|             | Probe          | 5' YY-TTTTCGTAAATGCACTTGCTTCAGGACCA-BHQ1 3'         | 0.5                           |
| <b>SSR5</b> | Forward primer | 5' GTCGAAGGTGGAGACAAAGATAG 3'                       | 1                             |
|             | Reverse primer | 5' CGGACTCTTCATCGATTGGTATC 3'                       | 1                             |
|             | Probe          | 5' 6FAM-TCGTTGAGA/ZEN/TGAAGCGACCAGGAGATG-3IABkFQ 3' | 0.5                           |

3

4 **Supplementary table 2: Pathogen identification by qPCR compared to bacteriological culture.**

| Target organism PCR result           | Target organism culture result |                | Total N |
|--------------------------------------|--------------------------------|----------------|---------|
|                                      | Positive N (%)                 | Negative N (%) |         |
| <b><i>Streptococcus pyogenes</i></b> |                                |                |         |
| Positive                             | 127 (50.8)                     | 72 (28.8)      | 199     |
| Negative                             | 0 (0)                          | 51 (20.4)      | 51      |
| Total                                | 127 (50.8)                     | 123 (49.2)     | 250     |
| <b><i>Staphylococcus aureus</i></b>  |                                |                |         |
| Positive                             | 194 (77.6)                     | 28 (11.2)      | 222     |
| Negative                             | 8 (3.2)                        | 20 (8)         | 28      |
| Total                                | 202 (80.8)                     | 48 (19.2)      | 250     |

5

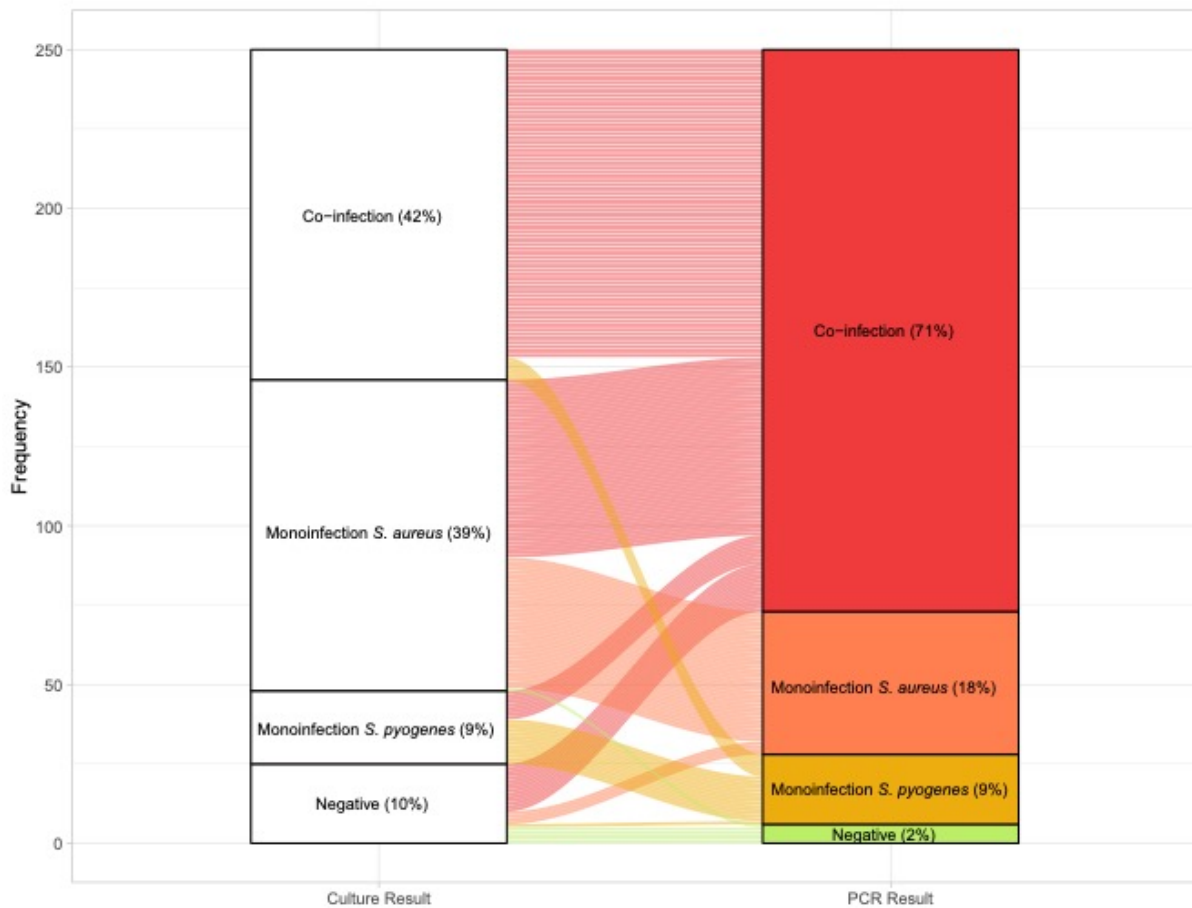

6

7 **Supplementary figure 1:** Change in distribution of bacteriological results between culture and  
 8 qPCR.

9

10

11 **Supplementary table 3:** Identification of *S. scabiei* by qPCR compared to clinical diagnosis.

12

| Clinical diagnosis | PCR positive<br>N (%) | PCR negative<br>N (%) | Total<br>N |
|--------------------|-----------------------|-----------------------|------------|
| Infected scabies   | 4 (16)                | 21 (84)               | 25         |
| Scabies elsewhere  | 7 (16)                | 38 (84)               | 45         |
| No scabies         | 32 (18)               | 148 (82)              | 180        |

13

14 'Scabies elsewhere' = Individuals where scabies and pyoderma were present at different body  
 15 sites. The swab was taken from the pyoderma lesion.

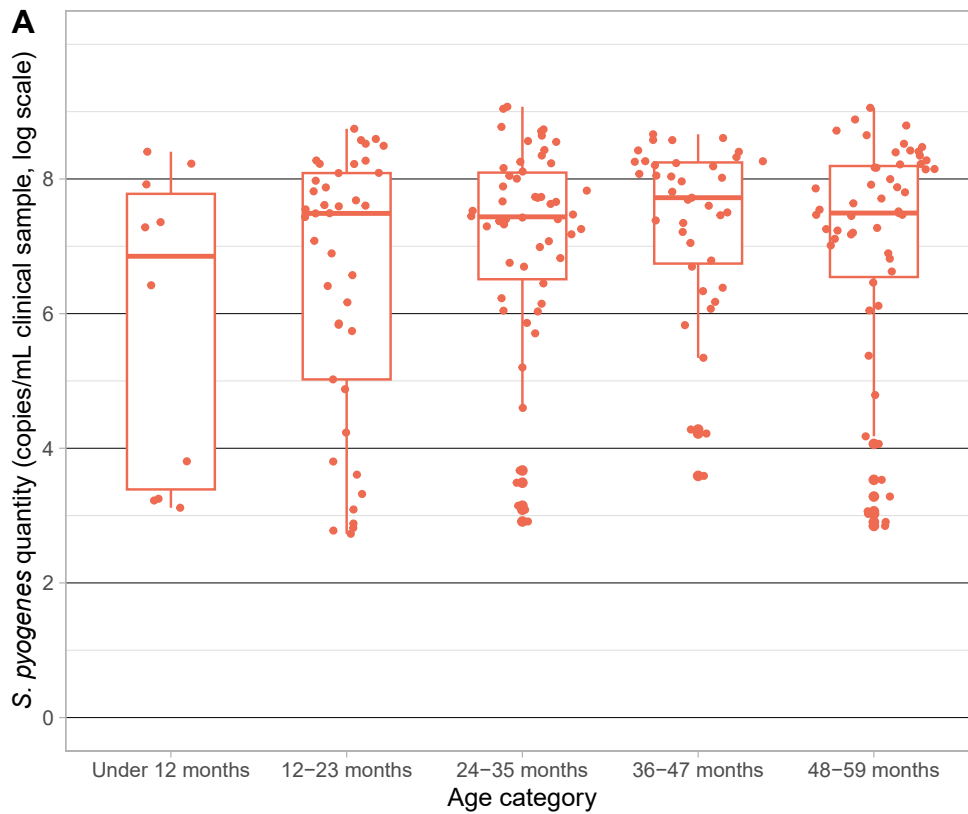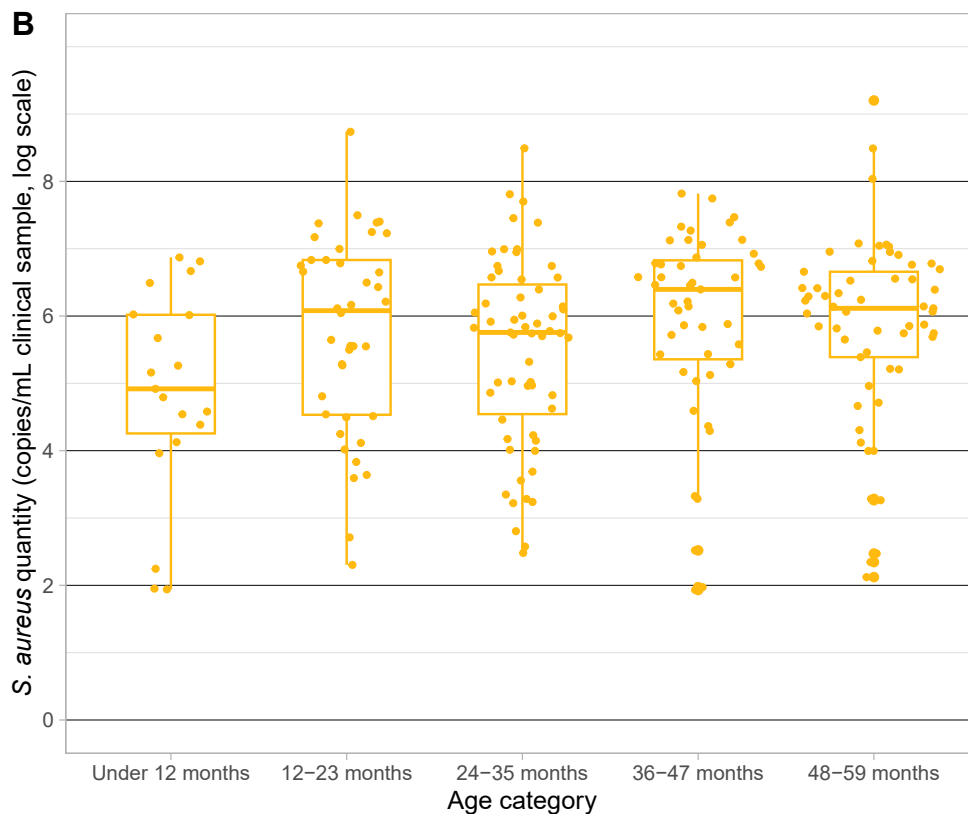

16

17 **Supplementary figure 2:** Bacterial quantity in PCR-positive samples for (A) *S. pyogenes* and

18 (B) *S. aureus*, by age category. Pairwise comparisons using two-tailed Mann Whitney U tests

19 showed no significant difference in quantity between age categories.

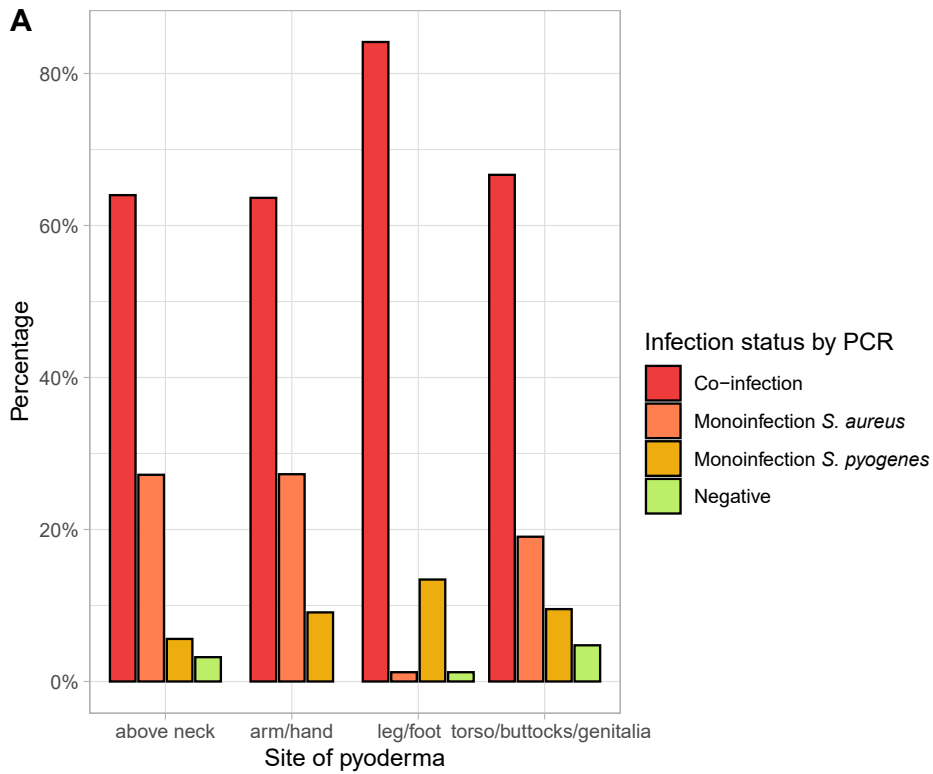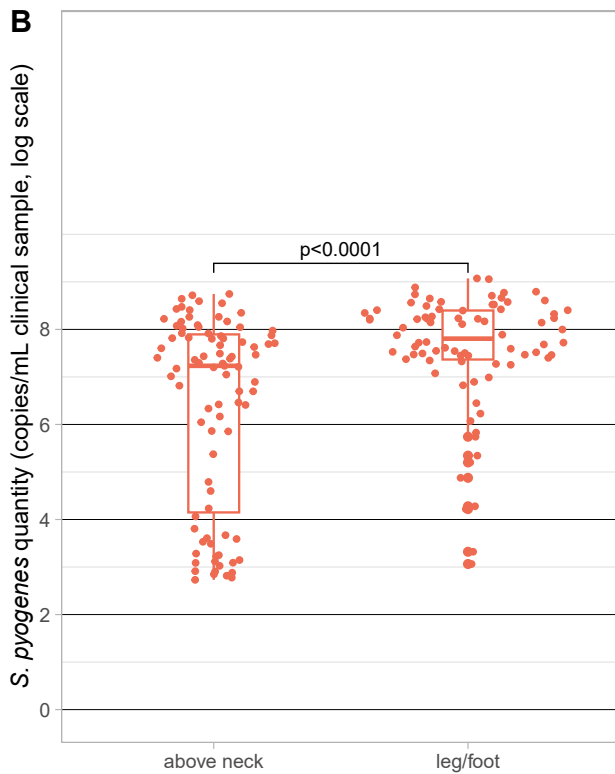

20

21 **Supplementary figure 3: (A)** Participant infection status by site of pyoderma, as determined  
 22 by qPCR result. Those with infection status 'Negative' had a clinical diagnosis of pyoderma but  
 23 neither *S. pyogenes* nor *S. aureus* were detected by qPCR. **(B)** Sample bacterial quantity for *S.*

24 *pyogenes* in samples taken from pyoderma lesions above the neck and in the leg or foot.

25 Statistical differences determined using a two-tailed Mann Whitney U test.

26

27 **Supplementary table 4: emm-typing by culture status.**

| Typing method            | Culture positive,<br>PCR positive<br>N (%) | Culture negative,<br>PCR positive<br>N (%) | Total<br>N |
|--------------------------|--------------------------------------------|--------------------------------------------|------------|
| Emm-typed by WGS         | 107                                        | -                                          | 107        |
| Emm-typed by PCR         | 19 (41.3)                                  | 27 (58.7)                                  | 46         |
| Nested PCR alone         | 0 (0)                                      | 27 (100)                                   | 27         |
| Nested PCR + PCR with Q5 | 19 (100)                                   | 0 (0)                                      | 19         |
| Could not be typed       | 1 (2.2)                                    | 45 (97.8)                                  | 46         |

28 WGS was attempted on culture-positive samples only.

29

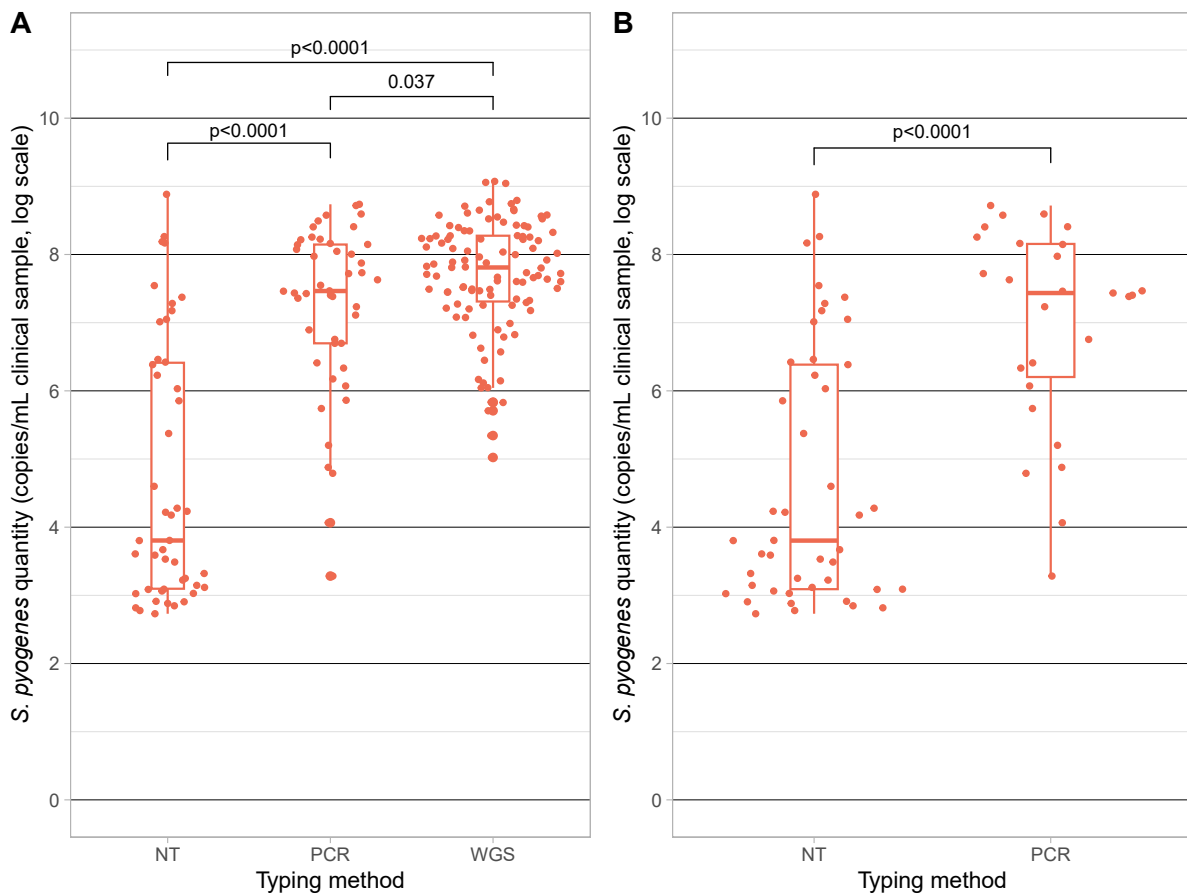

30

31 **Supplementary figure 4: Bacterial quantity in *S. pyogenes* qPCR-positive samples according to**

32 **emm-typing method for (A) all samples and (B) culture-negative samples. NT = not typeable**

33 by WGS or PCR. Statistical differences determined using a two-tailed Mann Whitney U test.  
 34 There was no statistical difference in bacterial quantity between samples typed using nested  
 35 PCR alone compared to samples requiring nested PCR and an additional amplification using  
 36 Q5.

37

38 **Supplementary table 5:** Summary of total participant number, number with pyoderma,  
 39 number with *S. pyogenes* on qPCR, and *emm*-typing, by geographical cluster.

| Geographical cluster ID | All participants | Participants with pyoderma | <i>S. pyogenes</i> PCR positive | No of isolates <i>emm</i> -typed (WGS + PCR) | No of different <i>emm</i> -types | <i>emm</i> -types (N) identified by PCR but not WGS                                                       |
|-------------------------|------------------|----------------------------|---------------------------------|----------------------------------------------|-----------------------------------|-----------------------------------------------------------------------------------------------------------|
| 6                       | 277              | 74                         | 55                              | 40                                           | 27                                | 4 (1); 28 (1); 65 (1); 73 (2); 74 (1); 77 (1); 82 (1); 85 (1); 88 (1); 109 (1); 116 (1); 119 (1); 209 (1) |
| 5                       | 82               | 43                         | 41                              | 30                                           | 18                                | 4 (3); 25 (1); 74 (1); 81 (1)                                                                             |
| 22                      | 68               | 36                         | 30                              | 25                                           | 20                                | 56 (1); 66 (2); 74 (1); 75 (1); 85 (1); 89 (1); 104 (1); 119 (1)                                          |
| 17                      | 306              | 34                         | 22                              | 18                                           | 12                                | 18 (2); 81 (1); 118 (1); 208 (1); 209 (2)                                                                 |
| 21                      | 243              | 21                         | 16                              | 12                                           | 11                                | 86 (1); 109 (1); 111 (1)                                                                                  |
| 13                      | 113              | 18                         | 16                              | 12                                           | 8                                 | 4 (2)                                                                                                     |
| 16                      | 189              | 15                         | 12                              | 9                                            | 8                                 | 102 (1)                                                                                                   |
| 33                      | 207              | 7                          | 5                               | 5                                            | 4                                 | 88 (1); 104 (1); 111 (1)                                                                                  |
| 20                      | 62               | 2                          | 2                               | 2                                            | 2                                 | 105 (1)                                                                                                   |
| <b>Total</b>            | <b>1547</b>      | <b>250</b>                 | <b>199</b>                      | <b>153</b>                                   |                                   |                                                                                                           |

40 Clusters ordered by detected number of pyoderma cases, from high to low.
